# Supplementary material
Source: publisher figshare collection journal article supplement (https://acs.figshare.com/ndownloader/files/4589143)
Supplement: Supplementary file 1 [file 4589143]

 
data_compd9a
 
_audit_creation_method            SHELXL-97
_chemical_name_systematic
;
 ?
;
_chemical_name_common             ?
_chemical_melting_point           ?
_chemical_formula_moiety          'C17 H18 N2 O4 Si'
_chemical_formula_sum
 'C17 H18 N2 O4 Si'
_chemical_formula_weight          342.42
 
loop_
 _atom_type_symbol
 _atom_type_description
 _atom_type_scat_dispersion_real
 _atom_type_scat_dispersion_imag
 _atom_type_scat_source
 'C'  'C'   0.0033   0.0016
 'International Tables Vol C Tables 4.2.6.8 and 6.1.1.4'
 'H'  'H'   0.0000   0.0000
 'International Tables Vol C Tables 4.2.6.8 and 6.1.1.4'
 'N'  'N'   0.0061   0.0033
 'International Tables Vol C Tables 4.2.6.8 and 6.1.1.4'
 'O'  'O'   0.0106   0.0060
 'International Tables Vol C Tables 4.2.6.8 and 6.1.1.4'
 'Si'  'Si'   0.0817   0.0704
 'International Tables Vol C Tables 4.2.6.8 and 6.1.1.4'
 
_symmetry_cell_setting            monoclinic
_symmetry_space_group_name_H-M    C2/c
_symmetry_space_group_name_Hall   -C2yc
 
loop_
 _symmetry_equiv_pos_as_xyz
 'x, y, z'
 '-x, y, -z+1/2'
 'x+1/2, y+1/2, z'
 '-x+1/2, y+1/2, -z+1/2'
 '-x, -y, -z'
 'x, -y, z-1/2'
 '-x+1/2, -y+1/2, -z'
 'x+1/2, -y+1/2, z-1/2'
 
_cell_length_a                    23.1498(7)
_cell_length_b                    6.4984(2)
_cell_length_c                    24.0295(7)
_cell_angle_alpha                 90.00
_cell_angle_beta                  114.7100(10)
_cell_angle_gamma                 90.00
_cell_volume                      3283.92(17)
_cell_formula_units_Z             8
_cell_measurement_temperature     100(2)
_cell_measurement_reflns_used     78664
_cell_measurement_theta_min        2.546
_cell_measurement_theta_max        30.034
 
_exptl_crystal_description        needle
_exptl_crystal_colour             colorless
_exptl_crystal_size_max           0.58
_exptl_crystal_size_mid           0.16
_exptl_crystal_size_min           0.08
_exptl_crystal_density_meas       ?
_exptl_crystal_density_diffrn     1.385
_exptl_crystal_density_method     'not measured'
_exptl_crystal_F_000              1440
_exptl_absorpt_coefficient_mu     0.167
_exptl_absorpt_correction_type    multi-scan
_exptl_absorpt_correction_T_min   0.809
_exptl_absorpt_correction_T_max   0.990
_exptl_absorpt_process_details    SORTAV
 
_exptl_special_details
;
 ?
;
 
_diffrn_ambient_temperature       100(2)
_diffrn_radiation_wavelength      0.71073
_diffrn_radiation_type            MoK\a
_diffrn_radiation_source          'fine-focus sealed tube'
_diffrn_radiation_monochromator   graphite
_diffrn_measurement_device_type   'Nonius Kappa CCD area detector'
_diffrn_measurement_method        'phi and omega scans'
_diffrn_detector_area_resol_mean  ?
_diffrn_standards_number          ?
_diffrn_standards_interval_count  ?
_diffrn_standards_interval_time   ?
_diffrn_standards_decay_%         ?
_diffrn_reflns_number             28428
_diffrn_reflns_av_R_equivalents   0.0613
_diffrn_reflns_av_sigmaI/netI     0.0377
_diffrn_reflns_limit_h_min        -32
_diffrn_reflns_limit_h_max        32
_diffrn_reflns_limit_k_min        -9
_diffrn_reflns_limit_k_max        9
_diffrn_reflns_limit_l_min        -33
_diffrn_reflns_limit_l_max        33
_diffrn_reflns_theta_min          3.20
_diffrn_reflns_theta_max          29.99
_reflns_number_total              4759
_reflns_number_gt                 3690
_reflns_threshold_expression      >2sigma(I)
 
_computing_data_collection        ?
_computing_cell_refinement        ?
_computing_data_reduction         ?
_computing_structure_solution     ?
_computing_structure_refinement   'SHELXL-97 (Sheldrick, 1997)'
_computing_molecular_graphics     ?
_computing_publication_material   ?
 
_refine_special_details
;
 Refinement of F^2^ against ALL reflections.  The weighted R-factor wR and
 goodness of fit S are based on F^2^, conventional R-factors R are based
 on F, with F set to zero for negative F^2^. The threshold expression of
 F^2^ > 2sigma(F^2^) is used only for calculating R-factors(gt) etc. and is
 not relevant to the choice of reflections for refinement.  R-factors based
 on F^2^ are statistically about twice as large as those based on F, and R-
 factors based on ALL data will be even larger.
;
 
_refine_ls_structure_factor_coef  Fsqd
_refine_ls_matrix_type            full
_refine_ls_weighting_scheme       calc
_refine_ls_weighting_details
 'calc w=1/[\s^2^(Fo^2^)+(0.0555P)^2^+1.5830P] where P=(Fo^2^+2Fc^2^)/3'
_atom_sites_solution_primary      direct
_atom_sites_solution_secondary    difmap
_atom_sites_solution_hydrogens    geom
_refine_ls_hydrogen_treatment     mixed
_refine_ls_extinction_method      none
_refine_ls_extinction_coef        ?
_refine_ls_number_reflns          4759
_refine_ls_number_parameters      224
_refine_ls_number_restraints      0
_refine_ls_R_factor_all           0.0635
_refine_ls_R_factor_gt            0.0424
_refine_ls_wR_factor_ref          0.1105
_refine_ls_wR_factor_gt           0.1029
_refine_ls_goodness_of_fit_ref    1.060
_refine_ls_restrained_S_all       1.060
_refine_ls_shift/su_max           0.000
_refine_ls_shift/su_mean          0.000
 
loop_
 _atom_site_label
 _atom_site_type_symbol
 _atom_site_fract_x
 _atom_site_fract_y
 _atom_site_fract_z
 _atom_site_U_iso_or_equiv
 _atom_site_adp_type
 _atom_site_occupancy
 _atom_site_symmetry_multiplicity
 _atom_site_calc_flag
 _atom_site_refinement_flags
 _atom_site_disorder_assembly
 _atom_site_disorder_group
Si1 Si 0.463660(18) 0.59969(6) 0.105460(17) 0.02118(10) Uani 1 1 d . . .
O1 O 0.31468(5) 0.19406(15) 0.05017(5) 0.0261(2) Uani 1 1 d . . .
O2 O 0.24776(5) -0.07325(15) 0.03441(4) 0.0235(2) Uani 1 1 d . . .
O3 O 0.24746(5) 0.34700(16) 0.18296(5) 0.0281(2) Uani 1 1 d . . .
O4 O 0.39281(5) 0.65330(15) 0.10533(4) 0.0237(2) Uani 1 1 d . . .
N1 N 0.25119(5) 0.15844(17) 0.10429(5) 0.0210(2) Uani 1 1 d . . .
N2 N 0.31096(5) 0.45705(17) 0.13636(5) 0.0212(2) Uani 1 1 d . . .
H2N H 0.3235(8) 0.423(2) 0.1080(8) 0.023(4) Uiso 1 1 d . . .
C1 C 0.27546(7) 0.1058(2) 0.06234(6) 0.0219(3) Uani 1 1 d . . .
C2 C 0.20652(6) -0.1366(2) 0.05948(6) 0.0206(3) Uani 1 1 d . . .
C3 C 0.17077(6) -0.3140(2) 0.04530(7) 0.0239(3) Uani 1 1 d . . .
H3 H 0.1709 -0.4079 0.0150 0.029 Uiso 1 1 calc R . .
C4 C 0.13452(7) -0.3465(2) 0.07830(7) 0.0272(3) Uani 1 1 d . . .
H4 H 0.1090 -0.4667 0.0706 0.033 Uiso 1 1 calc R . .
C5 C 0.13476(7) -0.2072(2) 0.12221(7) 0.0284(3) Uani 1 1 d . . .
H5 H 0.1094 -0.2354 0.1438 0.034 Uiso 1 1 calc R . .
C6 C 0.17093(7) -0.0273(2) 0.13574(7) 0.0252(3) Uani 1 1 d . . .
H6 H 0.1706 0.0684 0.1655 0.030 Uiso 1 1 calc R . .
C7 C 0.20743(6) 0.0035(2) 0.10321(6) 0.0206(3) Uani 1 1 d . . .
C8 C 0.26957(6) 0.3303(2) 0.14555(6) 0.0218(3) Uani 1 1 d . . .
C9 C 0.33667(6) 0.6404(2) 0.16826(6) 0.0205(3) Uani 1 1 d . . .
C10 C 0.32048(7) 0.7273(2) 0.21290(6) 0.0235(3) Uani 1 1 d . . .
H10 H 0.2903 0.6613 0.2241 0.028 Uiso 1 1 calc R . .
C11 C 0.34863(7) 0.9107(2) 0.24101(7) 0.0272(3) Uani 1 1 d . . .
H11 H 0.3376 0.9697 0.2714 0.033 Uiso 1 1 calc R . .
C12 C 0.39265(7) 1.0079(2) 0.22488(7) 0.0293(3) Uani 1 1 d . . .
H12 H 0.4119 1.1327 0.2445 0.035 Uiso 1 1 calc R . .
C13 C 0.40879(7) 0.9233(2) 0.17998(7) 0.0271(3) Uani 1 1 d . . .
H13 H 0.4389 0.9904 0.1689 0.033 Uiso 1 1 calc R . .
C14 C 0.38078(6) 0.7410(2) 0.15152(6) 0.0217(3) Uani 1 1 d . . .
C15 C 0.44679(7) 0.4067(2) 0.04386(7) 0.0273(3) Uani 1 1 d . . .
H15A H 0.4222 0.2930 0.0499 0.041 Uiso 1 1 calc R . .
H15B H 0.4869 0.3536 0.0451 0.041 Uiso 1 1 calc R . .
H15C H 0.4224 0.4713 0.0040 0.041 Uiso 1 1 calc R . .
C16 C 0.51559(8) 0.4980(3) 0.18242(7) 0.0353(4) Uani 1 1 d . . .
H16A H 0.5208 0.6030 0.2135 0.053 Uiso 1 1 calc R . .
H16B H 0.5573 0.4626 0.1836 0.053 Uiso 1 1 calc R . .
H16C H 0.4961 0.3748 0.1908 0.053 Uiso 1 1 calc R . .
C17 C 0.50121(8) 0.8308(2) 0.08958(8) 0.0346(4) Uani 1 1 d . . .
H17A H 0.4707 0.8999 0.0528 0.052 Uiso 1 1 calc R . .
H17B H 0.5386 0.7896 0.0830 0.052 Uiso 1 1 calc R . .
H17C H 0.5142 0.9252 0.1245 0.052 Uiso 1 1 calc R . .
 
loop_
 _atom_site_aniso_label
 _atom_site_aniso_U_11
 _atom_site_aniso_U_22
 _atom_site_aniso_U_33
 _atom_site_aniso_U_23
 _atom_site_aniso_U_13
 _atom_site_aniso_U_12
Si1 0.02094(19) 0.02044(19) 0.02372(19) 0.00107(14) 0.01088(15) -0.00027(14)
O1 0.0279(5) 0.0250(5) 0.0311(5) -0.0053(4) 0.0180(4) -0.0067(4)
O2 0.0259(5) 0.0207(5) 0.0290(5) -0.0045(4) 0.0164(4) -0.0063(4)
O3 0.0341(6) 0.0271(5) 0.0305(5) -0.0034(4) 0.0208(5) -0.0017(4)
O4 0.0214(5) 0.0249(5) 0.0267(5) -0.0048(4) 0.0120(4) -0.0016(4)
N1 0.0215(6) 0.0203(5) 0.0239(6) -0.0016(4) 0.0123(5) -0.0026(4)
N2 0.0219(6) 0.0206(5) 0.0227(6) -0.0031(4) 0.0108(5) -0.0012(4)
C1 0.0235(6) 0.0197(6) 0.0240(6) -0.0013(5) 0.0114(5) -0.0019(5)
C2 0.0188(6) 0.0212(6) 0.0246(6) 0.0028(5) 0.0116(5) 0.0005(5)
C3 0.0231(7) 0.0203(6) 0.0293(7) 0.0006(5) 0.0119(6) -0.0006(5)
C4 0.0243(7) 0.0239(7) 0.0358(8) 0.0033(6) 0.0148(6) -0.0029(5)
C5 0.0270(7) 0.0302(7) 0.0338(8) 0.0054(6) 0.0183(6) -0.0010(6)
C6 0.0241(7) 0.0273(7) 0.0267(7) 0.0004(5) 0.0129(6) 0.0011(5)
C7 0.0182(6) 0.0199(6) 0.0232(6) 0.0018(5) 0.0081(5) -0.0005(5)
C8 0.0223(7) 0.0196(6) 0.0232(6) -0.0002(5) 0.0093(5) 0.0019(5)
C9 0.0190(6) 0.0187(6) 0.0209(6) -0.0013(5) 0.0054(5) 0.0020(5)
C10 0.0227(7) 0.0245(7) 0.0225(6) -0.0007(5) 0.0087(5) 0.0033(5)
C11 0.0286(7) 0.0256(7) 0.0250(7) -0.0046(5) 0.0088(6) 0.0040(6)
C12 0.0281(7) 0.0239(7) 0.0310(7) -0.0082(6) 0.0076(6) -0.0015(6)
C13 0.0250(7) 0.0222(7) 0.0327(8) -0.0044(6) 0.0106(6) -0.0029(5)
C14 0.0198(6) 0.0205(6) 0.0237(6) -0.0018(5) 0.0079(5) 0.0028(5)
C15 0.0260(7) 0.0263(7) 0.0319(7) -0.0019(6) 0.0144(6) 0.0002(6)
C16 0.0351(9) 0.0420(9) 0.0294(8) 0.0054(7) 0.0140(7) 0.0120(7)
C17 0.0375(9) 0.0322(8) 0.0388(9) -0.0024(7) 0.0208(7) -0.0111(7)
 
_geom_special_details
;
 All esds (except the esd in the dihedral angle between two l.s. planes)
 are estimated using the full covariance matrix.  The cell esds are taken
 into account individually in the estimation of esds in distances, angles
 and torsion angles; correlations between esds in cell parameters are only
 used when they are defined by crystal symmetry.  An approximate (isotropic)
 treatment of cell esds is used for estimating esds involving l.s. planes.
;
 
loop_
 _geom_bond_atom_site_label_1
 _geom_bond_atom_site_label_2
 _geom_bond_distance
 _geom_bond_site_symmetry_2
 _geom_bond_publ_flag
Si1 O4 1.6755(10) . ?
Si1 C15 1.8530(15) . ?
Si1 C17 1.8533(15) . ?
Si1 C16 1.8554(16) . ?
O1 C1 1.2084(16) . ?
O2 C1 1.3624(16) . ?
O2 C2 1.3872(15) . ?
O3 C8 1.2110(16) . ?
O4 C14 1.3756(16) . ?
N1 C1 1.3865(17) . ?
N1 C7 1.4208(17) . ?
N1 C8 1.4348(17) . ?
N2 C8 1.3499(18) . ?
N2 C9 1.4069(17) . ?
N2 H2N 0.875(17) . ?
C2 C3 1.3762(18) . ?
C2 C7 1.3839(19) . ?
C3 C4 1.3906(19) . ?
C3 H3 0.9500 . ?
C4 C5 1.388(2) . ?
C4 H4 0.9500 . ?
C5 C6 1.395(2) . ?
C5 H5 0.9500 . ?
C6 C7 1.3845(19) . ?
C6 H6 0.9500 . ?
C9 C10 1.3951(18) . ?
C9 C14 1.4056(19) . ?
C10 C11 1.391(2) . ?
C10 H10 0.9500 . ?
C11 C12 1.385(2) . ?
C11 H11 0.9500 . ?
C12 C13 1.394(2) . ?
C12 H12 0.9500 . ?
C13 C14 1.3862(19) . ?
C13 H13 0.9500 . ?
C15 H15A 0.9800 . ?
C15 H15B 0.9800 . ?
C15 H15C 0.9800 . ?
C16 H16A 0.9800 . ?
C16 H16B 0.9800 . ?
C16 H16C 0.9800 . ?
C17 H17A 0.9800 . ?
C17 H17B 0.9800 . ?
C17 H17C 0.9800 . ?
 
loop_
 _geom_angle_atom_site_label_1
 _geom_angle_atom_site_label_2
 _geom_angle_atom_site_label_3
 _geom_angle
 _geom_angle_site_symmetry_1
 _geom_angle_site_symmetry_3
 _geom_angle_publ_flag
O4 Si1 C15 105.07(6) . . ?
O4 Si1 C17 111.97(7) . . ?
C15 Si1 C17 110.16(7) . . ?
O4 Si1 C16 107.57(6) . . ?
C15 Si1 C16 112.80(7) . . ?
C17 Si1 C16 109.24(8) . . ?
C1 O2 C2 107.89(10) . . ?
C14 O4 Si1 127.78(9) . . ?
C1 N1 C7 108.33(11) . . ?
C1 N1 C8 126.95(11) . . ?
C7 N1 C8 124.57(11) . . ?
C8 N2 C9 126.51(12) . . ?
C8 N2 H2N 117.5(11) . . ?
C9 N2 H2N 116.0(11) . . ?
O1 C1 O2 122.19(12) . . ?
O1 C1 N1 129.25(13) . . ?
O2 C1 N1 108.56(11) . . ?
C3 C2 C7 123.76(13) . . ?
C3 C2 O2 126.36(12) . . ?
C7 C2 O2 109.86(11) . . ?
C2 C3 C4 115.46(13) . . ?
C2 C3 H3 122.3 . . ?
C4 C3 H3 122.3 . . ?
C5 C4 C3 121.51(13) . . ?
C5 C4 H4 119.2 . . ?
C3 C4 H4 119.2 . . ?
C4 C5 C6 122.33(13) . . ?
C4 C5 H5 118.8 . . ?
C6 C5 H5 118.8 . . ?
C7 C6 C5 115.98(13) . . ?
C7 C6 H6 122.0 . . ?
C5 C6 H6 122.0 . . ?
C2 C7 C6 120.96(12) . . ?
C2 C7 N1 105.34(11) . . ?
C6 C7 N1 133.70(13) . . ?
O3 C8 N2 128.03(13) . . ?
O3 C8 N1 119.17(12) . . ?
N2 C8 N1 112.80(11) . . ?
C10 C9 C14 119.51(12) . . ?
C10 C9 N2 124.99(13) . . ?
C14 C9 N2 115.49(12) . . ?
C11 C10 C9 119.90(13) . . ?
C11 C10 H10 120.0 . . ?
C9 C10 H10 120.0 . . ?
C12 C11 C10 120.36(13) . . ?
C12 C11 H11 119.8 . . ?
C10 C11 H11 119.8 . . ?
C11 C12 C13 120.22(13) . . ?
C11 C12 H12 119.9 . . ?
C13 C12 H12 119.9 . . ?
C14 C13 C12 119.85(14) . . ?
C14 C13 H13 120.1 . . ?
C12 C13 H13 120.1 . . ?
O4 C14 C13 122.78(13) . . ?
O4 C14 C9 117.04(12) . . ?
C13 C14 C9 120.15(13) . . ?
Si1 C15 H15A 109.5 . . ?
Si1 C15 H15B 109.5 . . ?
H15A C15 H15B 109.5 . . ?
Si1 C15 H15C 109.5 . . ?
H15A C15 H15C 109.5 . . ?
H15B C15 H15C 109.5 . . ?
Si1 C16 H16A 109.5 . . ?
Si1 C16 H16B 109.5 . . ?
H16A C16 H16B 109.5 . . ?
Si1 C16 H16C 109.5 . . ?
H16A C16 H16C 109.5 . . ?
H16B C16 H16C 109.5 . . ?
Si1 C17 H17A 109.5 . . ?
Si1 C17 H17B 109.5 . . ?
H17A C17 H17B 109.5 . . ?
Si1 C17 H17C 109.5 . . ?
H17A C17 H17C 109.5 . . ?
H17B C17 H17C 109.5 . . ?
 
loop_
 _geom_torsion_atom_site_label_1
 _geom_torsion_atom_site_label_2
 _geom_torsion_atom_site_label_3
 _geom_torsion_atom_site_label_4
 _geom_torsion
 _geom_torsion_site_symmetry_1
 _geom_torsion_site_symmetry_2
 _geom_torsion_site_symmetry_3
 _geom_torsion_site_symmetry_4
 _geom_torsion_publ_flag
C15 Si1 O4 C14 160.51(11) . . . . ?
C17 Si1 O4 C14 -79.93(13) . . . . ?
C16 Si1 O4 C14 40.10(13) . . . . ?
C2 O2 C1 O1 178.57(13) . . . . ?
C2 O2 C1 N1 -1.01(14) . . . . ?
C7 N1 C1 O1 -178.43(14) . . . . ?
C8 N1 C1 O1 -2.7(2) . . . . ?
C7 N1 C1 O2 1.10(15) . . . . ?
C8 N1 C1 O2 176.86(12) . . . . ?
C1 O2 C2 C3 -177.74(13) . . . . ?
C1 O2 C2 C7 0.54(15) . . . . ?
C7 C2 C3 C4 -0.1(2) . . . . ?
O2 C2 C3 C4 177.94(13) . . . . ?
C2 C3 C4 C5 0.3(2) . . . . ?
C3 C4 C5 C6 0.2(2) . . . . ?
C4 C5 C6 C7 -0.8(2) . . . . ?
C3 C2 C7 C6 -0.5(2) . . . . ?
O2 C2 C7 C6 -178.84(12) . . . . ?
C3 C2 C7 N1 178.46(12) . . . . ?
O2 C2 C7 N1 0.14(15) . . . . ?
C5 C6 C7 C2 0.9(2) . . . . ?
C5 C6 C7 N1 -177.72(14) . . . . ?
C1 N1 C7 C2 -0.75(15) . . . . ?
C8 N1 C7 C2 -176.63(12) . . . . ?
C1 N1 C7 C6 178.04(15) . . . . ?
C8 N1 C7 C6 2.2(2) . . . . ?
C9 N2 C8 O3 -1.2(2) . . . . ?
C9 N2 C8 N1 178.49(12) . . . . ?
C1 N1 C8 O3 -174.26(13) . . . . ?
C7 N1 C8 O3 0.8(2) . . . . ?
C1 N1 C8 N2 6.02(19) . . . . ?
C7 N1 C8 N2 -178.87(12) . . . . ?
C8 N2 C9 C10 -3.8(2) . . . . ?
C8 N2 C9 C14 177.70(13) . . . . ?
C14 C9 C10 C11 -0.9(2) . . . . ?
N2 C9 C10 C11 -179.34(13) . . . . ?
C9 C10 C11 C12 0.1(2) . . . . ?
C10 C11 C12 C13 0.4(2) . . . . ?
C11 C12 C13 C14 -0.2(2) . . . . ?
Si1 O4 C14 C13 51.85(18) . . . . ?
Si1 O4 C14 C9 -129.95(11) . . . . ?
C12 C13 C14 O4 177.52(13) . . . . ?
C12 C13 C14 C9 -0.6(2) . . . . ?
C10 C9 C14 O4 -177.11(12) . . . . ?
N2 C9 C14 O4 1.50(18) . . . . ?
C10 C9 C14 C13 1.1(2) . . . . ?
N2 C9 C14 C13 179.75(12) . . . . ?
 
_diffrn_measured_fraction_theta_max    0.997
_diffrn_reflns_theta_full              29.99
_diffrn_measured_fraction_theta_full   0.997
_refine_diff_density_max    0.376
_refine_diff_density_min   -0.323
_refine_diff_density_rms    0.054
